# Supplementary material for: Diagnostic Accuracy of Early Secretory Antigenic Target-6–Free Interferon-gamma Release Assay Compared to QuantiFERON-TB Gold In-tube
Source: PubMed Central journal article supplement (PMC6821223; doi:10.1093/cid/ciz034), 2019-01-21
Supplement: ciz034_suppl_supplementary_figure.pdf [file ciz034_suppl_supplementary_figure.pdf]

| A | Study aim                                                    | Study population                               | Cohort designation |
|---|--------------------------------------------------------------|------------------------------------------------|--------------------|
|   | 1. Evaluate recognition of ESAT-6 free IGRA antigen cocktail | Healthy QFT+ and QFT-South African adolescents | Cohort 1a          |
|   | 2. Define ESAT-6 free IGRA cut-off                           | Healthy M.tb-unexposed Danish adults           | Cohort 2a          |
|   |                                                              | TB patients, South African adults              | Cohort 2b          |
|   | 3. Validate ESAT-6 free IGRA diagnostic accuracy             | Healthy QFT+ and QFT-South African adolescents | Cohort 3           |
|   | 4. Assess ESAT-6 free IGRA variability                       | Healthy QFT+ and QFT-South African adults      | Cohort 1b          |

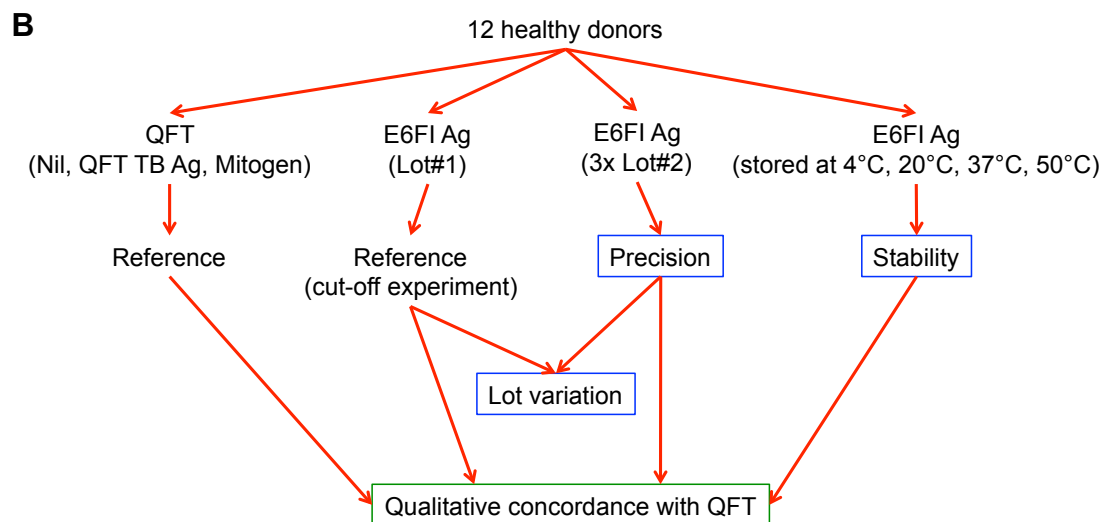

### Supplementary Figure 1: Study design.

(A) Study aims were addressed sequentially on independent cohorts of participants.

(B) ESAT-6 free IGRA qualification plan. Blood was collected from healthy donors (n=12, Cohort 1b) directly in Quantiferon-TB Gold (QFT) tubes (Nil, TB Ag, Mitogen) and 8 ESAT-6 free IGRA (E6FI) tubes: 1 tube from lot 1; 3 tubes from lot 2; 4 tubes that had been stored at 4, 20, 37 and 50°C for 2 weeks prior to long term storage at 4°C. Upon incubation at 37°C for 16-20h, IFN $\gamma$  concentration was measured by QFT ELISA. Precision was assessed by comparing results obtained from 3 identical E6FI tubes (lot 2). Lot variability was assessed between results obtained from lot 1 and the average obtained from lot 2. Stability was assessed across results obtained from tubes stored at different temperatures, considering those stored at 4°C as reference. Concordance of qualitative results obtained from E6FI and QFT was also assessed.

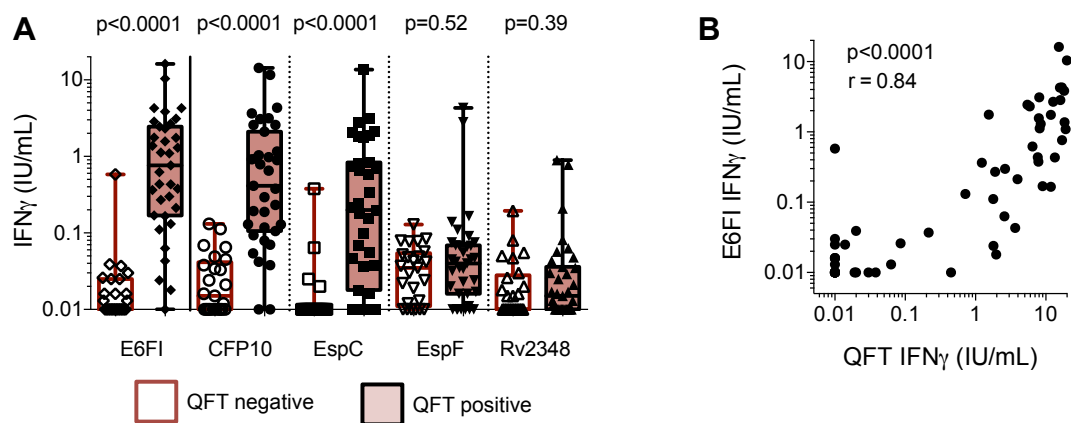

**Supplementary Figure 2: ESAT-6 free IGRA antigen recognition by South African adolescents**

**(A)** Whole blood collected from QuantiFERON-TB Gold negative (QFT-; n=25; open symbols) and QFT+ (n=35, filled symbols) adolescents (Cohort 1a) was stimulated with ESAT-6 free IGRA (E6FI) antigen cocktail as well as each of the antigens separately. IFN $\gamma$  concentration was measured by QFT ELISA. Box and whiskers denote median, inter-quartile range, minimum and maximum values. IFN $\gamma$  values (Ag - Nil) < 0.01 IU/mL have been set to 0.01 IU/mL to be plotted on a log scale. Results from QFT- and QFT+ adolescents were compared by Mann-Whitney test.

**(B)** Correlation between IFN $\gamma$  values obtained by QFT and E6FI in all participants was assessed by Spearman test.

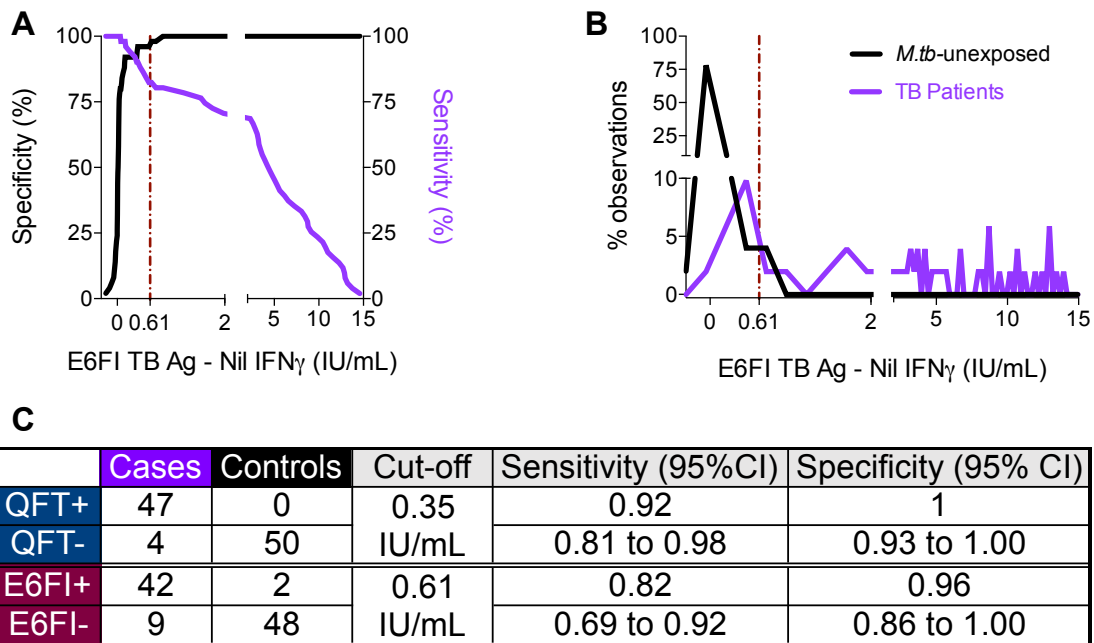

### Supplementary Figure 3: ESAT-6 free IGRA cut-off

Blood was collected from *M.tb*-unexposed controls (n=50, black, Cohort 2a) and microbiologically-confirmed TB patients (n=51, purple, Cohort 2b) in Quantiferon-TB Gold (QFT) and ESAT-6 free IGRA (E6FI) tubes, stimulated for 16-20h at 37°C and IFN $\gamma$  concentration was measured by QFT ELISA (Figure 2).

**(A)** E6FI sensitivity and specificity according to different cut-offs, calculated by ROC analysis, shown in Figure 2C.

**(B)** Distribution of IFN $\gamma$  values measured by E6FI in *M.tb*-unexposed controls and TB patients. The vertical dotted line denotes E6FI assay cut-off (0.61 IU/mL).

**(C)** QFT and E6FI sensitivity and specificity (95% confidence interval) were calculated upon definition of assay cut-offs (standard 0.35 IU/mL for QFT; 0.61 IU/mL for E6FI).

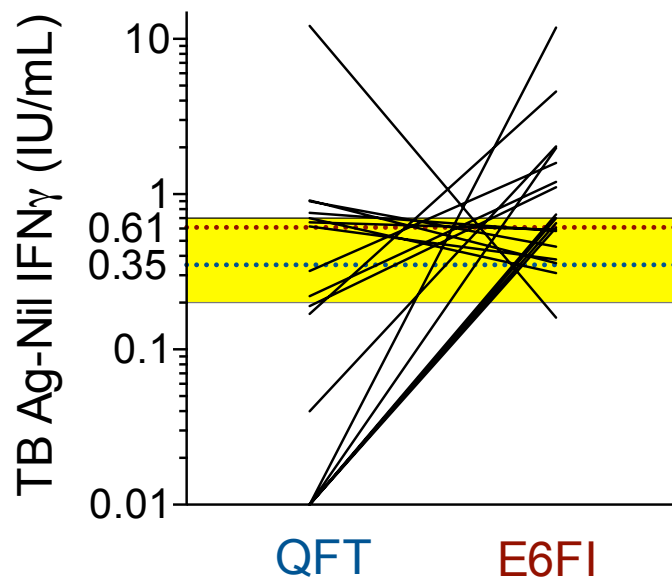

**Supplementary Figure 4: QFT uncertainty zone and discordant results**

IFN $\gamma$  values measured by Quantiferon-TB Gold (QFT) and ESAT-6 free IGRA (E6FI) in adolescents (Cohort 3, described in Figure 3 and Table 1) with discordant results. The dotted lines denote assay cut-offs: 0.35 IU/mL for QFT (blue line) and 0.61 IU/mL for E6FI (red line). The yellow area denotes QFT uncertainty zone (0.2-0.7 IU/mL).

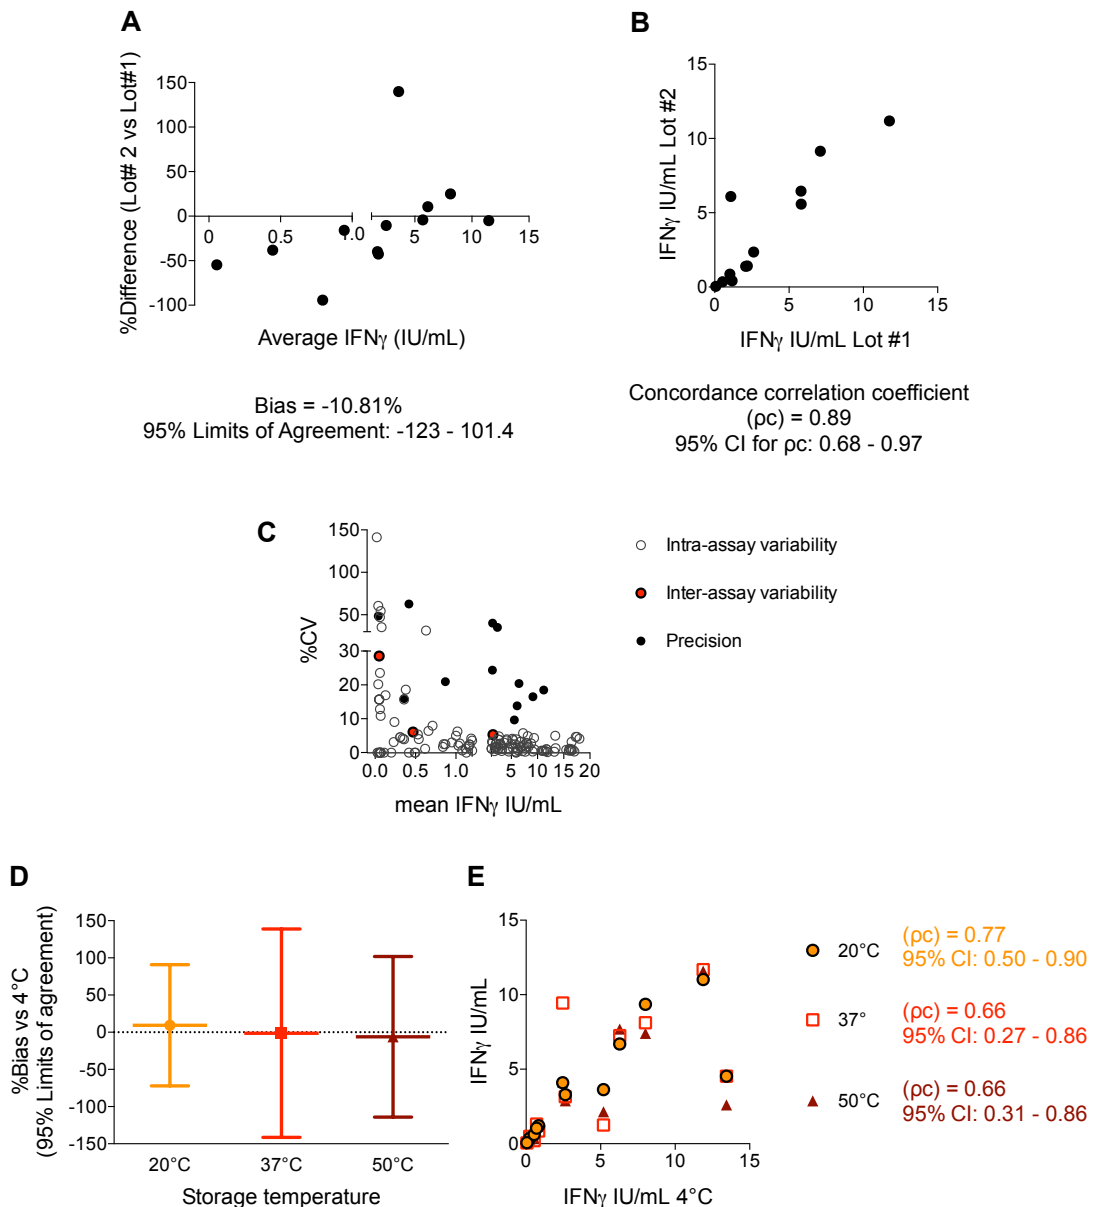

### Supplementary Figure 5: ESAT-6 free IGRA tube variability

Blood was collected from healthy donors (n=12, Cohort 1b) and analysed as described in Supplementary Figure 1B.

ESAT-6 free IGRA (E6FI) tubes lot variation was assessed by **(A)** Bland-Altman analysis and **(B)** correlation between results obtained from lot #1 and lot #2 (data from Figure 4A)

**(C)** Precision of E6FI tubes was assessed by plotting mean IFN $\gamma$  values measured upon blood incubation in 3 E6FI tubes against their coefficient of variation (%CV) for each participant (data from Figure 4B, black circles). For comparison, mean IFN $\gamma$  values measured in all individual samples (n=132) used for E6FI qualification experiments (Supplementary Figure 1B and Figure 4) are plotted against the coefficient of variation (%CV) calculated between duplicate ELISA wells, to assess ELISA intra-assay variability (grey circles). Internal quality controls samples (n=3) were included in each ELISA plate (n=4) to assess ELISA inter-assay variability (red circles).

E6FI tube stability was assessed by **(D)** Bland-Altman analysis and **(E)** correlation comparing results from E6FI tubes stored at the indicated temperatures to reference tubes stored at 4°C (data from Figure 4C).
